# Supplementary material
Source: PubMed Central journal article supplement (PMC4020179)
Supplement: NIHMS578824-supplement-01.pdf [file NIHMS578824-supplement-01.pdf]

**Proton-Detected 2D Radio Frequency Driven Recoupling Solid-state NMR Studies on  
Micelle-associated Cytochrome-b<sub>5</sub>**

Manoj Kumar Pandey<sup>1</sup>, Subramanian Vivekanandan<sup>1</sup>, Kazutoshi Yamamoto<sup>1</sup>, Sangchoul Im<sup>2</sup>,  
Lucy Waskell<sup>2</sup> and Ayyalusamy Ramamoorthy<sup>\*1</sup>

<sup>1</sup>Biophysics and Department of Chemistry, University of Michigan, Ann Arbor, Michigan  
48109-1055

<sup>2</sup>Department of Anesthesiology, University of Michigan and VA Medical Center, Ann Arbor,  
Michigan 48105

\*To whom correspondence should be addressed ([ramamoor@umich.edu](mailto:ramamoor@umich.edu))

**Figure S1.** Two-dimensional  $^1\text{H}$ - $^1\text{H}$  RFDR and NOESY pulse sequences used in this study.

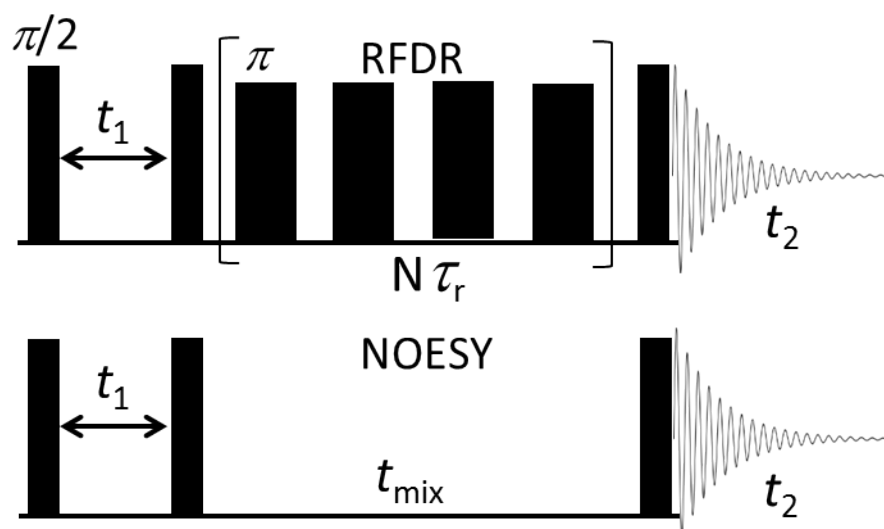

**Figure S2.** Superimposed 2D  $^1\text{H}$ - $^1\text{H}$  RFDR spectra of cytb<sub>5</sub> in the presence (black) and absence (blue) of DPC micelles recorded at mixing times of 25, 50, 100, 150, 200 and 300 ms, showing the alpha-side chain  $^1\text{H}$ - $^1\text{H}$  chemical shift correlations. More cross-peaks are observed in the presence of DPC micelles. This observation indicates the presence of unaveraged  $^1\text{H}$ - $^1\text{H}$  dipolar couplings in cytb<sub>5</sub> due to its interaction with DPC micelles that restricts the isotropic motion of the protein.

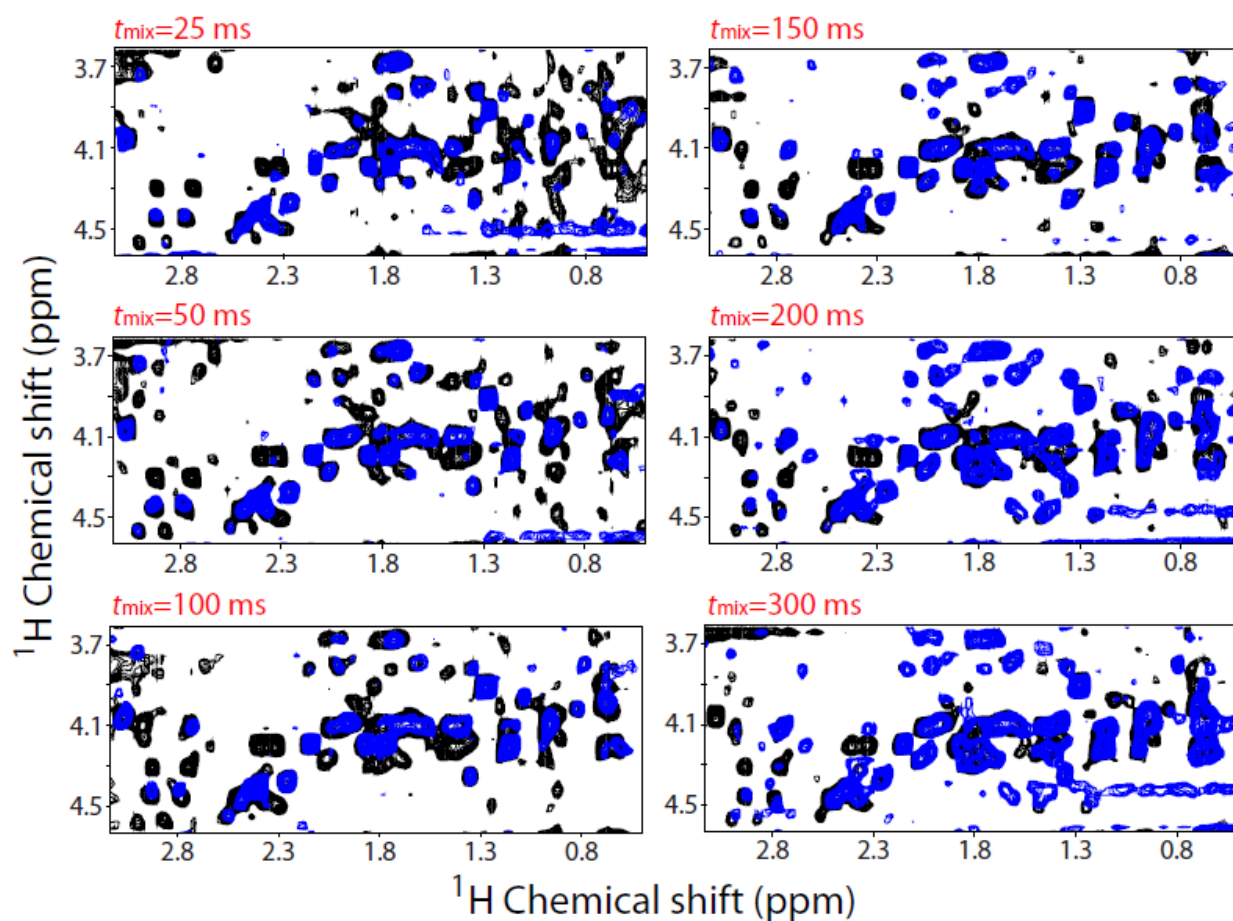

**Figure S3.** Superimposed 2D  $^1\text{H}$ - $^1\text{H}$  NOESY (red) and RFDR (black) spectra of  $\text{cytb}_5$  incorporated in DPC micelles recorded at mixing times of 25, 50, 100, 150, 200 and 300 ms, showing the chemical shift correlation of aromatic protons.

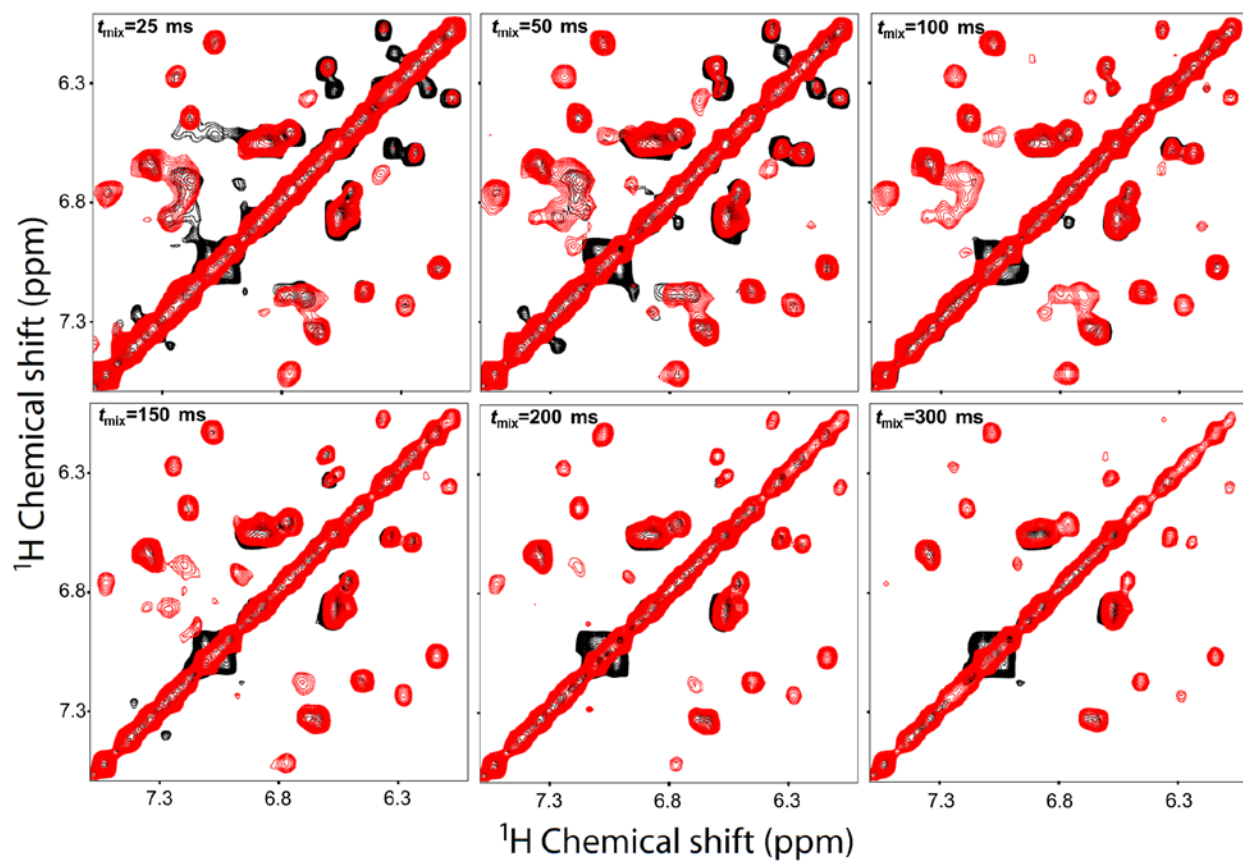

**Table S1.** Relaxation parameters obtained from the simulation of experimentally measured cross-peak intensities of cytb<sub>5</sub> in the absence of DPC micelles.

| Residues                             | RFDR                        |                         |                |
|--------------------------------------|-----------------------------|-------------------------|----------------|
|                                      | 1/T1*<br>(s <sup>-1</sup> ) | R<br>(s <sup>-1</sup> ) | I <sub>0</sub> |
| K39H <sub>ε</sub> -H <sub>β</sub>    | 1                           | 7                       | 15             |
| R52H <sub>δ</sub> -Q54H <sub>γ</sub> | 0.5                         | 11                      | 4              |
| M96H <sub>α</sub> -H <sub>β1</sub>   | 4.7                         | 5                       | 18             |
| E53H <sub>α</sub> -H <sub>γ2</sub>   | 1.5                         | 7                       | 3              |
| D71H <sub>α</sub> -H <sub>β2</sub>   | 2.5                         | 7                       | 10             |
| D6H <sub>α</sub> -H <sub>β1</sub>    | 2.5                         | 7                       | 10             |
